# Supplementary material for: Network Pharmacology Study on the Pharmacological Mechanism of Cinobufotalin Injection against Lung Cancer
Source: Evid Based Complement Alternat Med. 2020 Feb 17;2020:1246742. doi: 10.1155/2020/1246742 (PMC7048923; doi:10.1155/2020/1246742)
Supplement: Supplementary Materials — Table S1 is about the main effective components of cinobufacin injection. Table S2 is a description of GO analysis results of lung-cancer-related genes. Table S3 is a description of the results of KEGG analysis of lung-cancer-related genes. [file 1246742.f1.zip]

Archive with 3 entries (3 files):
- 1246742.f1/Table S1.doc
- 1246742.f1/Table S2.doc
- 1246742.f1/Table S3.doc
